# Supplementary material for: Probing adsorbent heterogeneity using Toth isotherms
Source: Royal Society of Chemistry journal article supplement (doi:10.1039/d0ta08150g), 2020-11-02
Supplement: d0ta08150g1.xlsx [file d0ta08150g1.xlsx]

## Sheet: Toth1
		slope	-79.998	-0.8009
		intercept	353	39.828
		initial guess values for N an K can be obtained from slope and intercept given in the above cells.
		N	16.5483	259.28
		K	3.97494	0.0264141
ce	#REF!	qe/Ce			qe,predic
0.0026	0.85	326.923	0.169275	0.0178053	0.18708	0.439463	420.998	285.002
0.0062	1.5	241.935	0.398018	0.0424547	0.440473	1.1226	472.997	233.003
0.016	2	125	0.989524	0.109532	1.09906	0.8117	512.996	193.004
0.021	2.8	133.333	1.27493	0.143742	1.41867	1.90808	576.994	129.006
0.032	3	93.75	1.86739	0.218972	2.08636	0.834744	592.994	113.006
0.041	3.5	85.3659	2.31899	0.280491	2.59948	0.810938	632.993	73.007
0.065	3.6	55.3846	3.39773	0.444399	3.84213	0.0586263	640.993	65.0072
0.072	4.1	56.9444	3.68222	0.492167	4.17439	0.00553327	680.992	25.0082
0.082	4.2	51.2195	4.06792	0.560376	4.6283	0.183438	688.992	36.4642
0.25	8.6	34.4	8.24815	1.70093	9.94909	1.82003	1040.98	32.9403
0.37	11	29.7297	9.85056	2.50948	12.36	1.84971	1232.98	31.0181
0.5	16	32	11.0091	3.37969	14.3888	2.59609	1632.97	27.0136
0.61	16	26.2295	11.7163	4.11143	15.8277	0.029682	1632.97	27.0136
1.5	24	16	14.1715	9.88146	24.053	0.00280561	2272.95	20.6064
2.3	31	13.4783	14.9167	14.8497	29.7665	1.52164	2832.94	15.0001
3.3	34	10.303	15.3761	20.7885	36.1646	4.68551	3072.93	12.5974
4.1	42	10.2439	15.5916	25.3357	40.9273	1.15071	3712.92	6.1902
						19.8313
