# Supplementary material for: Probing adsorbent heterogeneity using Toth isotherms
Source: Royal Society of Chemistry journal article supplement (doi:10.1039/d0ta08150g), 2020-11-02
Supplement: d0ta08150g2.pdf [file d0ta08150g2.pdf]

**Supplementary file for “Probing adsorbent heterogeneity using Toth isotherms”**

K. Vasanth Kumar,<sup>1,2\*</sup> S. Gadipelli,<sup>3</sup> Christopher A. Howard,<sup>4</sup> W. Karpinski,<sup>1</sup> D. J. L. Brett<sup>3</sup>

<sup>1</sup> Department of Chemical Sciences, University of Limerick, Limerick, Ireland.

<sup>2</sup> Synthesis and Solid State Pharmaceutical Centre, Bernal Institute, University of Limerick, Limerick, Ireland.

<sup>3</sup> Electrochemical Innovation Lab, Department of Chemical Engineering, UCL, London, United Kingdom.

<sup>4</sup> Department of Physics & Astronomy, University College London, London WC1E 6BT, United Kingdom.

\*Correspondence: Vasanth.kannuchamy@ul.ie

Table 1: Toth adsorption isotherm parameters obtained using a non-linear regression analysis. Also given is the optimized error function, the sum of the errors squared ( $ERRSQ = (q_{\text{experimental}} - q_{\text{predicted}})^2$ ).

Note: The units of binding affinity depend on the units of the equilibrium pressure or concentration in the experimental isotherm. If the pressure is expressed in terms of bar, then the unit of the binding affinity will be equal to 1/bar. Similarly, the units of the number of adsorption sites,  $N(K)$  depends on the unit of the amount adsorbed. If the amount adsorbed is expressed in terms of  $\mu\text{mol/g}$ , the  $N(K)$  will be expressed in terms of  $\mu\text{M/g}$ . The Toth isotherm parameters were obtained in this work based on the experimental data adapted from the cited references.

| Adsorbent   | Template used for synthesis or adsorbate used to obtain isotherms | $q_m$     | $b$     | $t$   | ERRSQ    | Sample name as reported in the original works | Units of binding affinity, $K$ | Units of $N(K)$   | Reference |
|-------------|-------------------------------------------------------------------|-----------|---------|-------|----------|-----------------------------------------------|--------------------------------|-------------------|-----------|
| Polymer 1   | Ethyl adenine-9-acetate                                           | 6686.956  | 1.081   | 0.126 | 17.505   | ---                                           | $\text{mM}^{-1}$               | $\mu\text{mol/g}$ | 1         |
| Polymer 2   | 9-Ethyl adenine                                                   | 399.970   | 0.566   | 0.158 | 8.079    | ---                                           | $\text{mM}^{-1}$               | $\mu\text{mol/g}$ | 2         |
| Polymer 3   | Cholesterol                                                       | 119.137   | 0.590   | 1     | 1899.098 | ---                                           | $\text{mM}^{-1}$               | $\mu\text{mol/g}$ | 3         |
| Polymer 4   | Diclofenac                                                        | 23.59077  | 0.179   | 1     | 1.224    | MIP 0                                         | $\text{mM}^{-1}$               | $\mu\text{mol/g}$ | 4         |
| Polymer 5   | Diclofenac                                                        | 26.2276   | 0.061   | 1     | 2.334    | MIP 10                                        | $\text{mM}^{-1}$               | $\mu\text{mol/g}$ | 4         |
| Polymer 6   | Diclofenac                                                        | 19.056    | 0.231   | 1     | 2.152    | MIP 20                                        | $\text{mM}^{-1}$               | $\mu\text{mol/g}$ | 4         |
| Polymer 7   | Diclofenac                                                        | 17.448    | 0.289   | 1     | 1.670    | MIP 30                                        | $\text{mM}^{-1}$               | $\mu\text{mol/g}$ | 4         |
| Polymer 8   | Mefanamic acid                                                    | 18.921    | 0.227   | 0.943 | 0.393    | MIP 0                                         | $\text{mM}^{-1}$               | $\mu\text{mol/g}$ | 4         |
| Polymer 9   | Mefanamic acid                                                    | 22.371    | 0.081   | 1     | 12.318   | MIP 10                                        | $\text{mM}^{-1}$               | $\mu\text{mol/g}$ | 4         |
| Polymer 10  | Mefanamic acid                                                    | 19.739    | 0.290   | 0.836 | 1.097    | MIP 20                                        | $\text{mM}^{-1}$               | $\mu\text{mol/g}$ | 4         |
| Polymer 11  | Mefanamic acid                                                    | 15.751    | 0.325   | 1     | 0.556    | MIP 30                                        | $\text{mM}^{-1}$               | $\mu\text{mol/g}$ | 4         |
| Polymer 12  | Sinapic acid                                                      | 161.586   | 0.075   | 1     | 3383.223 | MIP1                                          | L/mmol                         | $\mu\text{mol/g}$ | 5         |
| Polymer 13  | Sinapic acid                                                      | 44.370    | 0.068   | 1     | 152.405  | MIP3                                          | L/mmol                         | $\mu\text{mol/g}$ | 5         |
| Polymer 14  | Ibuprofen                                                         | 315.178   | 7.988   | 0.585 | 327.468  | MIP                                           | L/mg                           | mg/g              | 6         |
| Polymer 14  | Naproxen                                                          | 248.674   | 47.534  | 1     | 74.706   | MIP                                           | L/mg                           | mg/g              | 6         |
| Polymer 14  | Clofibrac acid                                                    | 294.781   | 24.935  | 0.911 | 223.132  | MIP                                           | L/mg                           | mg/g              | 6         |
| Polymer 14  | Diclofenac                                                        | 358.369   | 7.634   | 0.687 | 100.417  | MIP                                           | L/mg                           | mg/g              | 6         |
| Polymer 14  | Ketoprofen                                                        | 307.448   | 21.051  | 0.810 | 302.721  | MIP                                           | L/mg                           | mg/g              | 6         |
| Al-soc-MOF1 | Methane                                                           | 556.601   | 126.298 | 1     | 194.648  | Al-soc-MOF1                                   | $\text{bar}^{-1}$              | $\text{v/v}^*$    | 7         |
| MOF-905     | Methane                                                           | 432.172   | 71.296  | 1     | 228.517  | MOF-905                                       | $\text{bar}^{-1}$              | $\text{v/v}^*$    | 8         |
| LMA-738     | Methane                                                           | 11408.666 | 3.906   | 0.295 | 724.077  | LMA-738                                       | $\text{bar}^{-1}$              | $\text{v/v}^*$    | 9         |

|            |                 |          |       |       |                       |            |                   |       |    |
|------------|-----------------|----------|-------|-------|-----------------------|------------|-------------------|-------|----|
| MAXSORB    | Methane         | 3235.945 | 1.965 | 0.274 | 565.934               | MAXSORB    | bar <sup>-1</sup> | v/v*  | 9  |
| VR93       | CO <sub>2</sub> | 6962.065 | 3.265 | 0.416 | 1.127                 | VR93       | bar <sup>-1</sup> | mg/g  | 10 |
| MAXSORB    | CO <sub>2</sub> | 9847.422 | 2.408 | 0.264 | 0.854                 | MAXSORB    | bar <sup>-1</sup> | mg/g  | 10 |
| Merck      | Caffeine        | 1.330    | 0.408 | 0.660 | 1.5x10 <sup>-5</sup>  | Merck      | L/mol             | mol/L | 11 |
| Phenomenex | Caffeine        | 1.146    | 0.430 | 0.670 | 1.66x10 <sup>-5</sup> | Phenomenex | L/mol             | mol/L | 11 |
| Vydac      | Caffeine        | 0.353    | 0.406 | 0.446 | 1.89x10 <sup>-5</sup> | Vydac      | L/mol             | mol/L | 11 |
| Merck      | Phenol          | 3.359    | 0.433 | 0.572 | 7x10 <sup>-4</sup>    | Merck      | L/mol             | mol/L | 11 |
| Phenomenex | Phenol          | 2.455    | 0.380 | 2.455 | 6x10 <sup>-4</sup>    | Phenomenex | L/mol             | mol/L | 11 |
| Vydac      | Phenol          | 0.891    | 0.412 | 0.742 | 2x10 <sup>-5</sup>    | Vydac      | L/mol             | mol/L | 11 |

\*v/v = volume of adsorbent/volume of methane adsorbed

Table 2: Multi-site Langmuir isotherm parameters and the corresponding error function calculated using non-linear regression analysis technique. The experimental data were adapted from the cited references.

| Adsorbent  | Isotherm parameters    |          |                        |         |                        |   | Reference |
|------------|------------------------|----------|------------------------|---------|------------------------|---|-----------|
| Polymer 1  | $N_1, \mu\text{mol/g}$ | 16.548   | $N_2, \mu\text{mol/g}$ | 259.280 | $N_3, \mu\text{mol/g}$ | 0 | 1         |
|            | $K_1, \text{mM}^{-1}$  | 3.975    | $K_2, \text{mM}^{-1}$  | 0.026   | $K_3, \text{mM}^{-1}$  | 0 |           |
|            | ERRSQ                  |          |                        |         |                        |   |           |
| Polymer 2  | $N_1, \mu\text{mol/g}$ | 23.132   | $N_2, \mu\text{mol/g}$ | 95.121  | $N_3, \mu\text{mol/g}$ | 0 | 2         |
|            | $K_1, \text{mM}^{-1}$  | 5.810    | $K_2$                  | 0.044   | $K_3, \text{mM}^{-1}$  | 0 |           |
|            | ERRSQ                  |          |                        |         |                        |   |           |
| Polymer 3  | $N_1, \mu\text{mol/g}$ | 119.137  | $N_2, \mu\text{mol/g}$ | 0       | $N_3, \mu\text{mol/g}$ | 0 | 3         |
|            | $K_1, \text{mM}^{-1}$  | 1.695    | $K_2, \text{mM}^{-1}$  | 0       | $K_3, \text{mM}^{-1}$  | 0 |           |
|            | ERRSQ                  | 1899.098 |                        |         |                        |   |           |
| Polymer 12 | $N_1, \mu\text{mol/g}$ | 176.940  | $N_2, \mu\text{mol/g}$ | 0       | $N_3, \mu\text{mol/g}$ | 0 | 5         |
|            | $K_1, \text{L/mmol}$   | 5.915    | $K_1, \text{L/mmol}$   | 0       | $K_3, \text{L/mmol}$   | 0 |           |
|            | ERRSQ                  | 1275.963 |                        |         |                        |   |           |
| Polymer 13 | $N_1, \mu\text{mol/g}$ | 45.756   | $N_2, \mu\text{mol/g}$ | 0       | $N_3, \mu\text{mol/g}$ | 0 | 5         |
|            | $K_1, \text{L/mmol}$   | 9.395    | $K_1, \text{L/mmol}$   | 0       | $K_3, \text{L/mmol}$   | 0 |           |
|            | ERRSQ                  | 216.061  |                        |         |                        |   |           |

Table 3: Freundlich, Langmuir-Freundlich isotherms and their binding affinity distribution model.

Note:  $K_F$  and  $n$  are the Freundlich isotherm constants. The parameter,  $q_m$  is the maximum adsorption capacity usually expressed in terms of mmol/g,  $a$  and  $m$  are Langmuir-Freundlich isotherm constants. The parameter is  $m$  is related to the heterogeneity of the adsorbent and ranges from 0 to 1, where 1 signifies a homogeneous adsorbent and  $m < 1$  means the material is heterogeneous.

| Theoretical isotherm              | Affinity spectra of the theoretical isotherm                                                                                                                                  | Reference |
|-----------------------------------|-------------------------------------------------------------------------------------------------------------------------------------------------------------------------------|-----------|
| $q = K_F C_e^n$                   | $N(K) = 2.303 K_F n (1 - n^2) K^{-n}$                                                                                                                                         | 12        |
| $q = \frac{q_m a p^m}{1 + a p^m}$ | $N(K) = q_m a m (1/K)^m \frac{\left[ \left( 1 + 2a(1/K)^m + a^2(1/K)^{2m} + 4a(1/K)^m m^2 - a^2 \left( \frac{1}{K} \right)^{2m} m^2 - m^2 \right) \right]}{(1 + a(1/K)^m)^4}$ | 13        |

Table 4: Toth, Langmuir-Freundlich and Freundlich isotherm parameters and the corresponding error function calculated using a non-linear regression analysis technique.

Note: The experimental data were adapted from the cited references.\*

| Adsorbent  |                 | Toth                    |          | Freundlich |            | Langmuir-Freundlich     |          | Reference |
|------------|-----------------|-------------------------|----------|------------|------------|-------------------------|----------|-----------|
| VR93       | CO <sub>2</sub> | $q_m$ , mg/g            | 6962.065 | $k$        | 26.044     | $q_m$ , mg/g            | 552.898  | 10        |
|            |                 | $b$ , bar <sup>-1</sup> | 3.265    | $n$        | 0.419      | $a$ , bar <sup>-1</sup> | 0.205    |           |
|            |                 | $t$                     | 0.416    | ERRSQ      | 112501.544 | $m$                     | 0.827    |           |
|            |                 | ERRSQ                   | 1.127    |            |            | ERRSQ                   | 0.475    |           |
| MAXSORB    | CO <sub>2</sub> | $q_m$ , mg/g            | 9847.422 | $k$        | 34.004     | $q_m$ , mg/g            | 1337.919 | 10        |
|            |                 | $b$ , bar <sup>-1</sup> | 2.408    | $n$        | 0.385      | $a$ , bar <sup>-1</sup> | 0.189    |           |
|            |                 | $t$                     | 0.264    | ERRSQ      | 9503.187   | $m$                     | 0.899    |           |
|            |                 | ERRSQ                   | 0.854    |            |            | ERRSQ                   | 1.370    |           |
| Polymer 14 | Ibuprofen       | $q_m$ , mg/g            | 315.178  | $k$        | 21.564     | $q_m$ , mg/g            | 276.543  | 6         |
|            |                 | $b$ , L/mg              | 7.988    | $n$        | 0.416      | $a$ , bar <sup>-1</sup> | 0.034    |           |
|            |                 | $t$                     | 0.585    | ERRSQ      | 632.017    | $m$                     | 0.774    |           |
|            |                 | ERRSQ                   | 327.468  |            |            | ERRSQ                   | 295.861  |           |
| Polymer 14 | Naproxen        | $q_m$ , mg/g            | 248.674  | $k$        | 22.098     | $q_m$ , mg/g            | 248.675  | 6         |
|            |                 | $b$ , bar <sup>-1</sup> | 47.534   | $n$        | 0.431      | $a$ , bar <sup>-1</sup> | 0.021    |           |
|            |                 | $t$                     | 1        | ERRSQ      | 1140.810   | $m$                     | 1        |           |
|            |                 | ERRSQ                   | 74.706   |            |            | ERRSQ                   | 74.70617 |           |

\* It is worth to mention here Toth isotherm can produce better fit than Langmuir-Freundlich isotherm at higher pressures and for few cases, especially at lower pressures, Langmuir-Freundlich isotherm can provide a better fit than the Toth isotherm. It is essential to test the best-fit isotherm using a suitable regression analysis. If the experimental equilibrium data follows the Langmuir-Freundlich or a Freundlich isotherm, then we can use the affinity distribution functions given in Table 3 of the supplementary information).

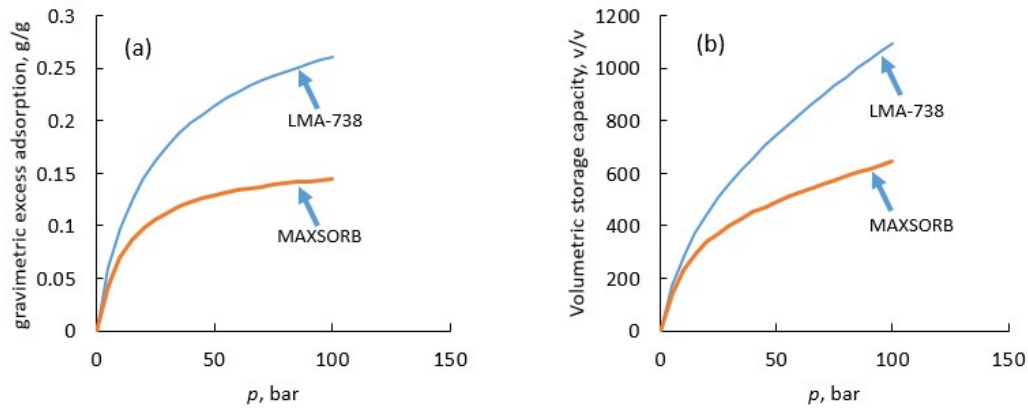

Figure 1: Methane storage capacity: (a) gravimetric capacity and (b) volumetric storage capacity. Figure 1a was adapted from the works of Casco et al.<sup>9</sup> The volumetric storage capacity was calculated using the procedure below.

**Step 1:** Let the amount adsorbed at 10 bar and 298 K be equal to 0.0972 g of CH<sub>4</sub>/g of adsorbent. This is experimentally measured value and thus corresponds to excess adsorption.

**Step 2:** At STP conditions, 1 g of CH<sub>4</sub> occupies 1.4115 L. Thus g of CH<sub>4</sub>/g of adsorbent will be equal to 0.0972 x 1.4115 = 0.1372 L/g or 137.298 cm<sup>3</sup> of CH<sub>4</sub>/g of adsorbent.

**Step 3:** According to the NIST fluid page, at 10 bar and 298 K, the bulk density of methane is 0.006588 g/cm<sup>3</sup>.

**Step 4:** If the pore volume of an adsorbent is 2.25 cm<sup>3</sup>/g (This is the pore volume of LMA-738. Then each gram should contain 2.25 cm<sup>3</sup> of pore space. This means the amount of methane that can be filled in unit mass of adsorbent that contains pores of volume 2.25 cm<sup>3</sup> will be equal to 0.006588\*2.225 = 0.014824 g of CH<sub>4</sub>/g of adsorbent.

**Step 5:** At STP conditions, 0.014824 g of CH<sub>4</sub>/g of adsorbent should be equal to 0.014824 x 1.4115 = 0.020924 L of CH<sub>4</sub>/g of adsorbent. This is the approximate amount of methane that will be stored in the adsorbent pores as bulk gas at 10 bar and 298 K.

**Step 6:** Thus the total adsorption will be equal to 0.1372 L/g (from **step 2**) + 0.020924 L of CH<sub>4</sub>/g of adsorbent (from **step 5**) = 0.158221625 L of CH<sub>4</sub>/g of adsorbent.

**Step 7:** If the skeletal or He density of the adsorbent is equal to 1.8 g/cm<sup>3</sup> or 1800 g/L. Then the volumetric storage capacity is equal to 0.158221625 L of CH<sub>4</sub>/g of adsorbent x 1800 g of adsorbent/L of adsorbent = 284 L/L.

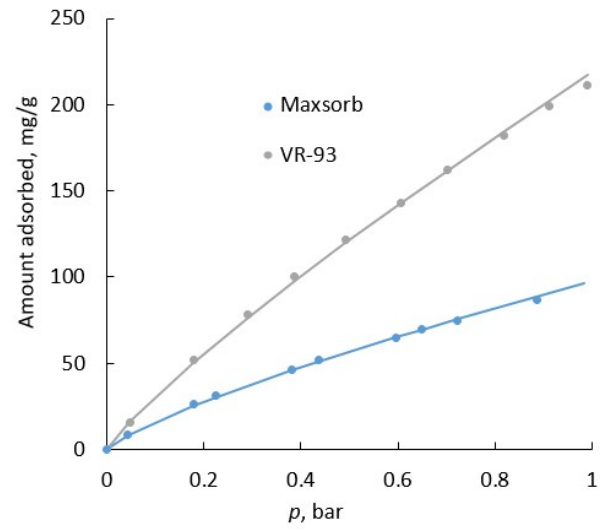

Figure 2: CO<sub>2</sub> adsorption isotherm at 298 K for Maxsorb and VR-93. The experimental data was adapted from the works of Silvestre-Albero et al.<sup>10</sup>



## References

- (1) Umpleby, R. J.; Bode, M.; Shimizu, K. D. Measurement of the Continuous Distribution of Binding Sites in Molecularly Imprinted Polymers. *Analyst* **2000**, *125* (7), 1261–1265. <https://doi.org/10.1039/b002354j>.
- (2) Shea, K. J.; Spivak, D. A.; Sellergren, B. Polymer Complements to Nucleotide Bases. Selective Binding of Adenine Derivatives to Imprinted Polymers. *Journal of the American Chemical Society*. American Chemical Society April 1, 1993, pp 3368–3369. <https://doi.org/10.1021/ja00061a061>.
- (3) Whitcombe, M. J.; Rodriguez, M. E.; Villar, P.; Vulfson, E. N. A New Method for the Introduction of Recognition Site Functionality into Polymers Prepared by Molecular Imprinting: Synthesis and Characterization of Polymeric Receptors for Cholesterol. *J. Am. Chem. Soc.* **1995**, *117* (27), 7105–7111. <https://doi.org/10.1021/ja00132a010>.
- (4) Anfossi, L.; Cavallera, S.; Di Nardo, F.; Spano, G.; Giovannoli, C.; Baggiani, C. Delayed Addition of Template Molecules Enhances the Binding Properties of Diclofenac-Imprinted Polymers. *Polymers (Basel)*. **2020**, *12* (5), 1178. <https://doi.org/10.3390/POLYM12051178>.
- (5) Fathi Til, R.; Alizadeh-Khaledabad, M.; Mohammadi, R.; Pirsá, S.; Wilson, L. D. Molecular Imprinted Polymers for the Controlled Uptake of Sinapic Acid from Aqueous Media. In *Food and Function*; Royal Society of Chemistry, 2020; Vol. 11, pp 895–906. <https://doi.org/10.1039/c9fo01598a>.
- (6) Dai, C. M.; Zhang, J.; Zhang, Y. L.; Zhou, X. F.; Duan, Y. P.; Liu, S. G. Selective Removal of Acidic Pharmaceuticals from Contaminated Lake Water Using Multi-Templates Molecularly Imprinted Polymer. *Chem. Eng. J.* **2012**, *211–212*, 302–309. <https://doi.org/10.1016/j.cej.2012.09.090>.
- (7) Alezi, D.; Belmabkhout, Y.; Suyetin, M.; Bhatt, P. M.; Weseliński, L. J.; Solovyeva, V.; Adil, K.; Spanopoulos, I.; Trikalitis, P. N.; Emwas, A. H.; Eddaoudi, M. MOF Crystal Chemistry Paving the Way to Gas Storage Needs: Aluminum-Based Soc -MOF for CH<sub>4</sub>, O<sub>2</sub>, and CO<sub>2</sub> Storage. *J. Am. Chem. Soc.* **2015**, *137* (41), 13308–13318. <https://doi.org/10.1021/jacs.5b07053>.
- (8) Jiang, J.; Furukawa, H.; Zhang, Y. B.; Yaghi, O. M. High Methane Storage Working Capacity in Metal-Organic Frameworks with Acrylate Links. *J. Am. Chem. Soc.* **2016**, *138* (32), 10244–10251. <https://doi.org/10.1021/jacs.6b05261>.
- (9) Casco, M. E.; Martínez-Escandell, M.; Gadea-Ramos, E.; Kaneko, K.; Silvestre-Albero, J.; Rodríguez-Reinoso, F. High-Pressure Methane Storage in Porous Materials: Are Carbon Materials in the Pole Position? *Chem. Mater.* **2015**, *27* (3), 959–964. <https://doi.org/10.1021/cm5042524>.
- (10) Silvestre-Albero, J.; Wahby, A.; Sepúlveda-Escribano, A.; Martínez-Escandell, M.; Kaneko, K.; Rodríguez-Reinoso, F. Ultrahigh CO<sub>2</sub> Adsorption Capacity on Carbon Molecular Sieves at Room Temperature. *Chem. Commun.* **2011**, *47* (24), 6840–6842. <https://doi.org/10.1039/c1cc11618e>.
- (11) Gritti, F.; Guiochon, G. Surface Heterogeneity of Six Commercial Brands of End-Capped C 18-Bonded Silica. RPLC Separations. *Anal. Chem.* **2003**, *75* (21), 5726–5738. <https://doi.org/10.1021/ac0301752>.
- (12) Umpleby, R. J.; Baxter, S. C.; Rampey, A. M.; Rushton, G. T.; Chen, Y.; Shimizu, K. D. Characterization of the Heterogeneous Binding Site Affinity

Distributions in Molecularly Imprinted Polymers. *Journal of Chromatography B: Analytical Technologies in the Biomedical and Life Sciences*. Elsevier May 5, 2004, pp 141–149. <https://doi.org/10.1016/j.jchromb.2004.01.064>.

- (13) Umpleby, R. J.; Baxter, S. C.; Chen, Y.; Shah, R. N.; Shimizu, K. D. Characterization of Molecularly Imprinted Polymers with the Langmuir - Freundlich Isotherm. *Anal. Chem.* **2001**, *73* (19), 4584–4591. <https://doi.org/10.1021/ac0105686>.
